# Supplementary material for: Is There a Classical Nonsense-Mediated Decay Pathway in Trypanosomes?
Source: PLOS journal article supplement (doi:10.1371/journal.pone.0025112), 2011-09-21
Supplement: S2 (10.1371/journal.pone.0025112.s002) [file journal.pone.0025112.s002]

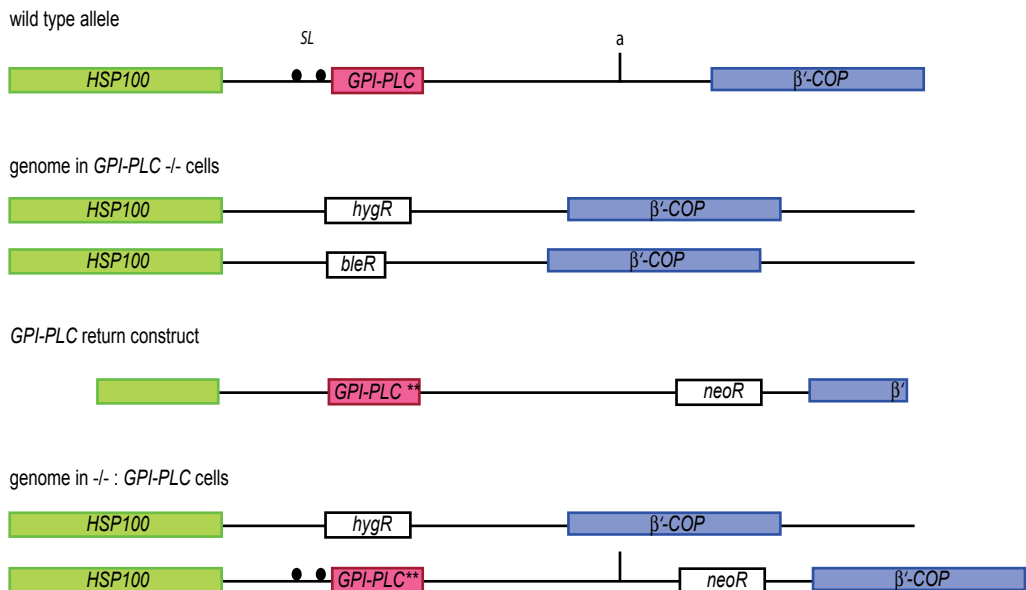

## Supplementary Figure S2

The strategy for replacement of the *GPI-PLC* gene with a mutant copy. In wild-type cells the *GPI-PLC* gene (pink) is flanked by *HSP100* (green) and  $\beta'$ -*COP* genes. The poly(A) site is marked as "a" and the two alternative spliced leader addition sites as black dots ("SL" for "spliced leader"). The panel below shows the loci in the double knockout line, and below that the construct that was used to return the full-length or PTC versions of *GPI-PLC*. The bottom panel shows the loci in cells containing the integrated return construct.
